# Supplementary material for: Patient information portal for congenital aortic and pulmonary valve disease: a stepped-wedge cluster randomised trial
Source: HighWire-hosted journal article supplement (doi:10.1136/openhrt-2020-001252), 2021-03-01
Supplement: openhrt-2020-001252supp001_data_supplement.pdf [file openhrt-2020-001252supp001_data_supplement.pdf]

## **Supplement 1. Secondary outcomes**

### *Feeling informed*

How well informed the subject felt about their (child's) heart defect (1 question), the risks thereof (1 question) and treatment options (1 question) was assessed using 5-point Likert scales (Supplement 2).

### *Experiences with patient information*

Subjects were asked to indicate whether they had experienced contradictions in the information they received from various sources using a 5-point Likert scale (Supplement 2).

### *Preference for involvement*

Preferences for involvement in own care and decision-making were assessed using the Autonomy Preference Index[30] and the Control Preferences Scale.[31,32] A higher score on the Autonomy Preference Index indicates a stronger preference for more involvement/autonomy.

### *Anxiety and depression*

Anxiety and depression were assessed using the Hospital Anxiety and Depression Scale (HADS).[31,32]

### *Health-related mental quality of life*

Health-related mental quality of life was assessed using the Mental Component of the Dutch version of the Short Form 36 Health Survey (SF-36).[33,34] Total Mental

Component raw scores as well as raw scores for each of its subscales were summed and transformed to a 0-100 scale.

*Satisfaction with the information portal (only intervention group)*

Subjects were asked to rate the contents (1 question) and design (1 question) of the information portal on a 1-10 scale (Supplement 2).

- 30 Ende J, Kazis L, Ash A, et al. Measuring patients' desire for autonomy: decision making and information-seeking preferences among medical patients. *J Gen Intern Med* 1989;**4**:23-30.
- 31 Degner LF, Sloan JA, Venkatesh P. The Control Preferences Scale. *Can J Nurs Res* 1997;**29**:21-43.
- 32 Pieterse AH, Baas-Thijssen MC, Marijnen CA, et al. Clinician and cancer patient views on patient participation in treatment decision-making: a quantitative and qualitative exploration. *Br J Cancer* 2008;**99**:875-82.
- 33 Ware JE, Jr., Sherbourne CD. The MOS 36-item short-form health survey (SF-36). I. Conceptual framework and item selection. *Med Care* 1992;**30**:473-83.
- 34 Aaronson NK, Muller M, Cohen PD, et al. Translation, validation, and norming of the Dutch language version of the SF-36 Health Survey in community and chronic disease populations. *J Clin Epidemiol* 1998;**51**:1055-68.

## Supplement 2. Questionnaires used in this study that have not been previously published (translated to English)

### Disease-specific knowledge (primary outcome)

- 1 **The heart has two outflow valves, the aortic valve and the pulmonary valve. Which valve is affected in your case?**
  - ☐ The aortic valve (correct answer depends on the patients personal condition, as recorded by the (pediatric) cardiologist)
  - ☐ The pulmonary valve
  - ☐ Both
  - ☐ I don't know
  
- 2 **My heart valve defect concerns a:**
  - ☐ Narrowing (stenosis) (correct answer depends on the patients personal condition, as recorded by the (pediatric) cardiologist)
  - ☐ Leakage (regurgitation)
  - ☐ Both
  - ☐ I don't know
  
- 3 **People who have been diagnosed with a heart valve defect: (only one answer possible)**
  - ☐ Usually do not need to undergo surgery. (incorrect)
  - ☐ Usually need to undergo 1 or multiple surgeries during their lifetime (correct)
  
- 4 **People with a heart valve defect usually do well in daily functioning.**
  - ☐ True (correct)
  - ☐ False (incorrect)
  - ☐ I don't know (incorrect)
  
- 5 **People with a heart valve defect never need to take this into account when considering work/career.**
  - ☐ True (incorrect)
  - ☐ False (correct)
  - ☐ I don't know (incorrect)
  
- 6 **What is the most important purpose of your check-ups?**
  - ☐ A routine check-up, without a specific purpose. (incorrect)
  - ☐ Personal reassurance. (incorrect)
  - ☐ To detect a deterioration in your condition. (correct)
  - ☐ To continue treatment with the latest techniques. (incorrect)

**7 Which of the following symptoms may indicate deterioration of your condition, in which case you should contact the cardiologist?**

1. Shortness of breath
2. Getting exhausted sooner upon exertion
3. Fainting

- ☐ 1 and 2 (incorrect)  
☐ 2 and 3 (incorrect)  
☐ 1 and 3 (incorrect)  
☐ All (1, 2 and 3) (correct)  
☐ I don't know (incorrect)

Feeling informed (secondary outcome)

**1. Do you feel like you have sufficient knowledge about your heart valve defect?**

Strongly disagree      1      2      3      4      5      Strongly agree

**2. Do you feel like you have sufficient knowledge about the risks of your heart valve defect?**

Strongly disagree      1      2      3      4      5      Strongly agree

**3. Do you feel like you have sufficient knowledge about the (possible) treatment options for your heart valve defect?**

Strongly disagree      1      2      3      4      5      Strongly agree

Experiences with patient information (secondary outcome)

**1. The information about my condition and the treatment options that I obtained from different care providers and/or other sources of information did not always correspond.**

Strongly disagree      1      2      3      4      5      Strongly agree

Satisfaction with the information portal (secondary outcome, only intervention group)

**1. How would you rate the website on a scale from 1 to 10 with regard to:**

Contents:      1      2      3      4      5      6      7      8      9      10

Design:      1      2      3      4      5      6      7      8      9      10

**Supplement 3.** Baseline characteristics of the subjects in the intervention group who visited the information portal and those who did not. PV=pulmonary valve.

ToF=tetralogy of Fallot. AV=aortic valve.

|                          | Intervention group:          |                        | p-value |
|--------------------------|------------------------------|------------------------|---------|
|                          | Did not visit portal<br>n=59 | Visited portal<br>n=63 |         |
| Age group                |                              |                        | 0.679   |
| -Children                | 40.7% (24)                   | 46% (29)               |         |
| -Adults                  | 59.3% (35)                   | 54% (34)               |         |
| Male sex                 | 49.2% (29)                   | 31.7% (20)             | 0.146   |
| Diagnosis                |                              |                        | 0.196   |
| -PV disease              | 57.6% (34)                   | 73% (46)               |         |
| -ToF                     | 28.8% (17)                   | 47.6% (30)             |         |
| -AV disease              | 39% (23)                     | 25.4% (16)             |         |
| -PV+AV disease           | 3.4% (2)                     | 1.6% (1)               |         |
| Educational level        |                              |                        | 0.083   |
| -Elementary              | 3.6% (2)                     | 0% (0)                 |         |
| -Lower vocational        | 10.9% (6)                    | 4.8% (3)               |         |
| -Lower secondary         | 9.1% (5)                     | 3.2% (2)               |         |
| -Intermediate vocational | 32.7% (18)                   | 33.9% (21)             |         |
| -Higher secondary        | 14.5% (8)                    | 6.5% (4)               |         |
| -Higher vocational       | 18.2% (10)                   | 37.1% (23)             |         |
| -University              | 10.9% (6)                    | 14.5% (9)              |         |
